# Supplementary material for: A thermally remendable and reprocessable crosslinked methyl methacrylate polymer based on oxygen insensitive dynamic reversible C–ON bonds
Source: Royal Society of Chemistry journal article supplement (doi:10.1039/c5ra22275c), 2016-01-01
Supplement: c5ra22275c1.pdf [file c5ra22275c1.pdf]

Supplementary Information

**Thermally remendable and reprocessable crosslinked methyl methacrylate polymer based on oxygen insensitive dynamic reversible C-ON bonds**

Ze Ping Zhang,<sup>a</sup> Yan Lu,<sup>a</sup> Min Zhi Rong,<sup>\*b</sup> Ming Qiu Zhang<sup>\*b</sup>

<sup>a</sup>Key Laboratory for Polymeric Composite and Functional Materials of Ministry of Education, GD HPPC Lab, School of Chemistry and Chemical Engineering, Sun Yat-sen University, Guangzhou 510275, P. R. China

<sup>b</sup>Materials Science Institute, Sun Yat-sen University, Guangzhou 510275, P. R. China

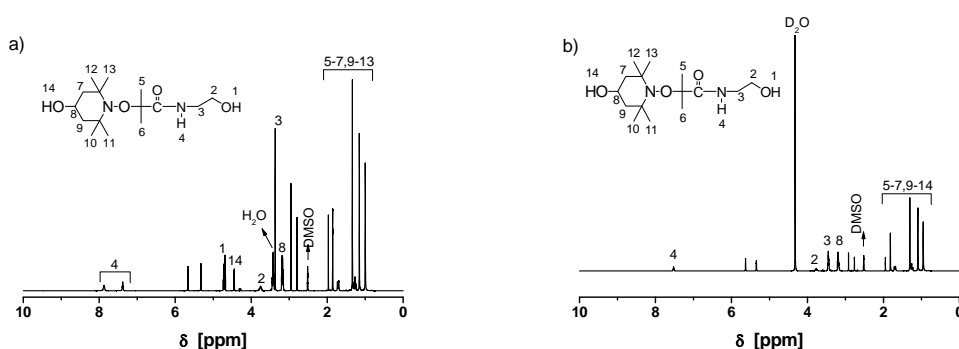

**Fig. S1** <sup>1</sup>H NMR spectra of Diol in (a) DMSO-d<sub>6</sub> and (b) DMSO-d<sub>6</sub> with D<sub>2</sub>O.

<sup>1</sup>H NMR (400 MHz, DMSO, 25 °C,  $\delta$ /ppm) with the following characteristic peaks demonstrating its chemical structure: 0.998, 1.154, 1.337, 1.701, 1.853, 1.969, 3.151, 3.370, 3.760, 4.444, 4.712, 7.394 and 7.874. 0.998~1.969 (complex, 23H, CH<sub>3</sub>, CH<sub>2</sub>, and CH of the TEMPO group, CH<sub>3</sub> linked to quaternary carbon atom), 3.151 (1H, HO-CH-(CH<sub>2</sub>)<sub>2</sub>), 3.370 (2H, -CO-NH-CH<sub>2</sub>), 3.760 (2H, CH<sub>2</sub>-CH<sub>2</sub>-OH), 4.444 (1H, reactive hydrogen of -OH connect to TEMPO group) and 4.712 (1H, reactive hydrogen of another -OH), 7.394 (1H, reactive hydrogen of amido, hydrogen bond), and 7.874 (1H, reactive hydrogen of amido, non-hydrogen bond). By comparing the spectra before and after deuterium oxide exchange, it is found that the signals of active hydrogen become weakened or even disappear, but that of amido is still detected owing to the slow exchange speed of amido.

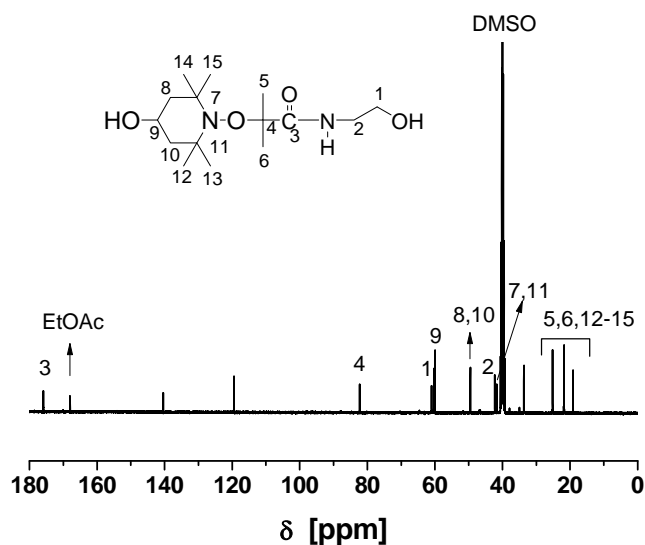

**Fig. S2**  $^{13}\text{C}$  NMR spectrum of Diol in DMSO- $d_6$ .

$^{13}\text{C}$  NMR (400MHz, DMSO, 25 °C,  $\delta$ /ppm) with the following characteristic peaks: 175.824 (C=O), 167.617 (C=O of solvent EtOAc), 82.241 (-O-C-C=O), 61.275 (-CH<sub>2</sub>-CH<sub>2</sub>-OH), 59.922 (-CH of TEMPO group which linked to -OH), 49.510 (CH<sub>2</sub> of the TEMPO group), 42.260 (-NH-CH<sub>2</sub>-CH<sub>2</sub>), 39.761 and 41.703 (-CH<sub>2</sub>-C-NO of the TEMPO group), 25.087 (-CH<sub>3</sub>-C-TEMPO), and 21.544.12-19.732 (CH<sub>3</sub> of the TEMPO group).

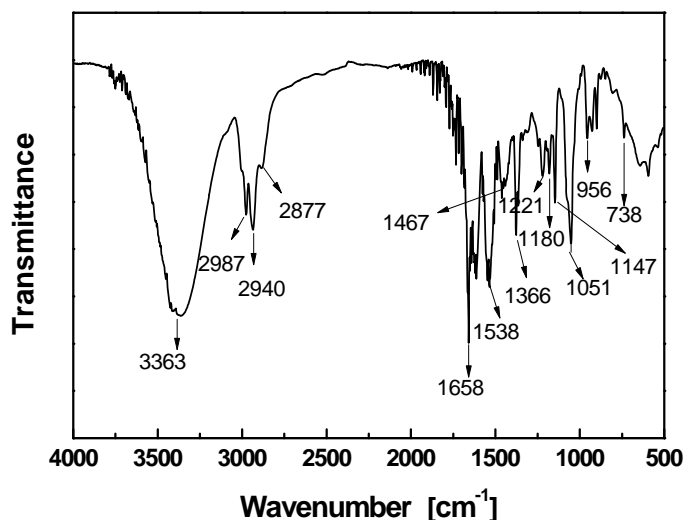

**Fig. S3** FTIR spectrum of Diol.

FTIR spectrum (KBr) of Diol with the following characteristic peaks: 3363  $\text{cm}^{-1}$  (-OH hydrogen bonding), 2987-2877  $\text{cm}^{-1}$  (-CH<sub>3</sub> and CH<sub>2</sub> stretching), 1658  $\text{cm}^{-1}$  (C=O free), 1538  $\text{cm}^{-1}$  (C-N-H bending stretching), 1467  $\text{cm}^{-1}$  (-CH<sub>2</sub> bending), 1377 and 1365  $\text{cm}^{-1}$  (-CH<sub>3</sub> anti-symmetric bending), 1310  $\text{cm}^{-1}$  (C-N stretching and C-H bending), 1221  $\text{cm}^{-1}$  (N-O stretching of

alkoxyamine), 1180  $\text{cm}^{-1}$  (C-N stretching), 1147  $\text{cm}^{-1}$  (C-O-N stretching), 1052  $\text{cm}^{-1}$  (C-O stretching), 956  $\text{cm}^{-1}$  (piperidine ring, bending), and 738  $\text{cm}^{-1}$  (N-H out-of-plane bending).

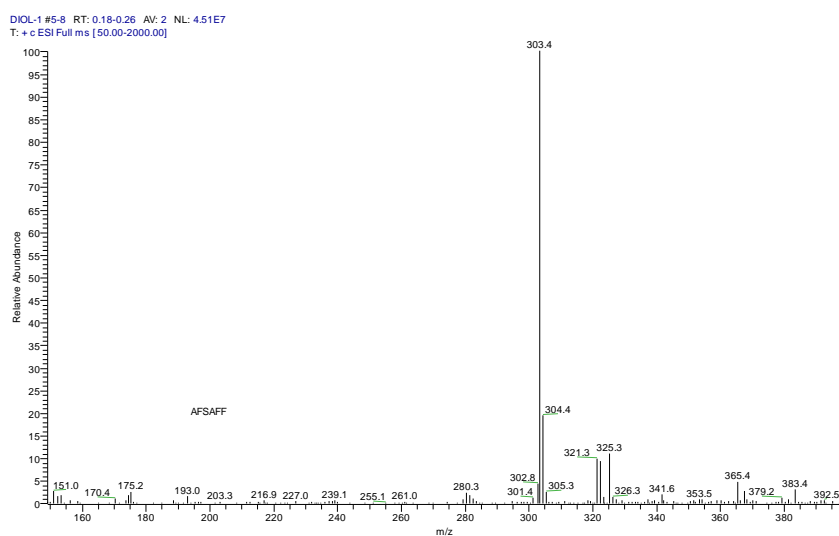

**Fig. S4** EI-MS spectrum of Diol.

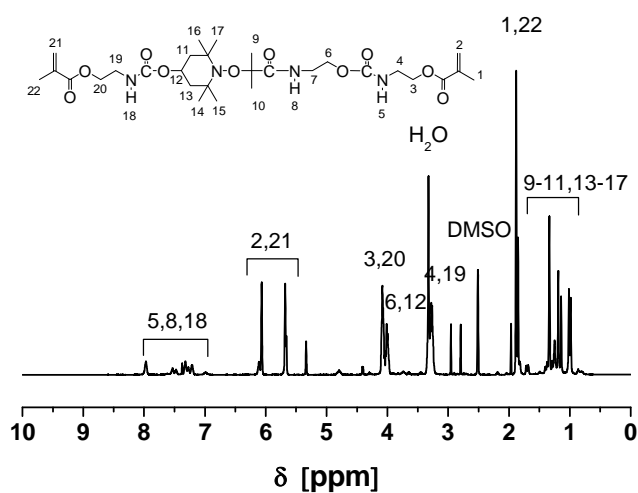

**Fig. S5**  $^1\text{H}$  NMR spectrum of Dima in DMSO- $d_6$ .

$^1\text{H}$  NMR (400MHz, DMSO, 25°C,  $\delta$ /ppm) with the following characteristic peaks demonstrating its chemical structure: 0.986, 1.190, 1.336, 1.717, 1.886, 1.966, 3.281, 3.997, 4.011, 4.082, 5.681, 6.067, 7.208-7.530, 7.969. 0.986-1.966 (complex, 27H,  $\text{CH}_3$  and  $\text{CH}_2$  of the TEMPO group,  $\text{CH}_3$  linked to quaternary carbon atom,  $\text{CH}_3$  linked to ethylene linkage), 3.281 (4H,  $-\text{OOC}-\text{NH}-\text{CH}_2$ ), 3.997 (1H,  $-\text{CH}$  of the TEMPO group), 4.011 (2H,  $-\text{CH}_2-\text{COO}-\text{NH}$ ), 4.082 (2H,  $-\text{CH}_2-\text{OOC}-$ ), 5.681 and 6.067 (4H,  $=\text{CH}_2$ ), 7.208-7.530 (3H, reactive hydrogen of amido, hydrogen bond), and 7.969 (3H, reactive hydrogen of amido, non-hydrogen bond).

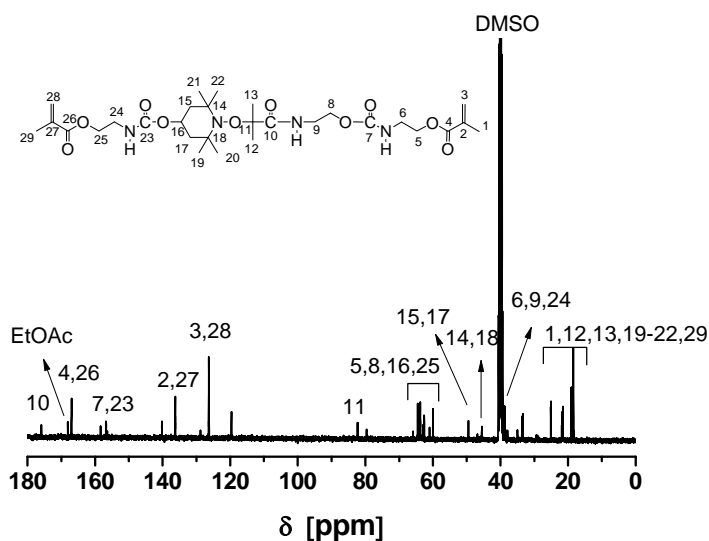

**Fig. S6**  $^{13}\text{C}$  NMR spectrum of Dima in DMSO- $d_6$ .

$^{13}\text{C}$  NMR (400MHz, DMSO,  $25^\circ\text{C}$ ,  $\delta/\text{ppm}$ ) with the following characteristic peaks: 176.101 (C-C=O-NH-), 166.866 (-O-C=O- of methacrylate ester), 158.427 and 156.253 (carbamate groups), 136.375 and 126.589 (-C=C- of methacrylate ester), 126.589 (-O-C=O- of methacrylate ester), 82.199 (-O-C-C=O), 64.515 and 63.455 (-CH<sub>2</sub> connect to oxygen atom of methacrylate ester), 62.573 and 59.920 (-CH<sub>2</sub> and -CH connect to carbamate groups), 49.581 (-CH<sub>2</sub> of TEMPO group), 45.770 (-C- of the TEMPO group), 39.011 (-CH<sub>2</sub> connect to nitrogen atom of carbamate groups), 38.753 (-CH<sub>2</sub> connect to nitrogen atom of amido), 25.090 (-CH<sub>3</sub>-C-TEMPO), 21.847.12-19.147 (CH<sub>3</sub> of the TEMPO group), and 18.309 (-CH<sub>3</sub> of methacrylate ester).

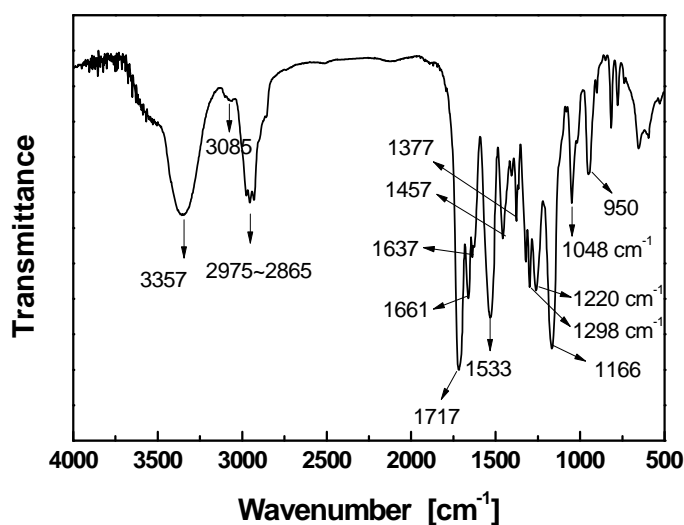

**Fig. S7** FTIR spectrum of Dima.

FTIR spectrum (KBr) of Dima with the following characteristic peaks: 3357  $\text{cm}^{-1}$  (-NH-stretching of amido and carbamate groups), 3085  $\text{cm}^{-1}$  (=CH stretching), 2975-2865  $\text{cm}^{-1}$  (-CH<sub>3</sub> and CH<sub>2</sub> stretching), 1717  $\text{cm}^{-1}$  (C=O of ester and carbamate groups), 1661  $\text{cm}^{-1}$  (C=O of amido group), 1637  $\text{cm}^{-1}$  (C=C stretching), 1533  $\text{cm}^{-1}$  (C-N-H bending stretching), 1457  $\text{cm}^{-1}$  (-CH<sub>2</sub> bending), 1376  $\text{cm}^{-1}$  (-CH<sub>3</sub>)<sub>2</sub> anti-symmetric bending), 1321  $\text{cm}^{-1}$  (-CH<sub>3</sub> anti-symmetric bending), 1298  $\text{cm}^{-1}$  (C-N stretching and C-H bending), 1260  $\text{cm}^{-1}$  (N-O stretching of alkoxyamine), 1220  $\text{cm}^{-1}$  (C-N stretching), 1166  $\text{cm}^{-1}$  (C-O-C stretching), 1048  $\text{cm}^{-1}$  (C-O stretching), 950  $\text{cm}^{-1}$  (piperidine ring, bending), and 738  $\text{cm}^{-1}$  (N-H out-of-plane bending).

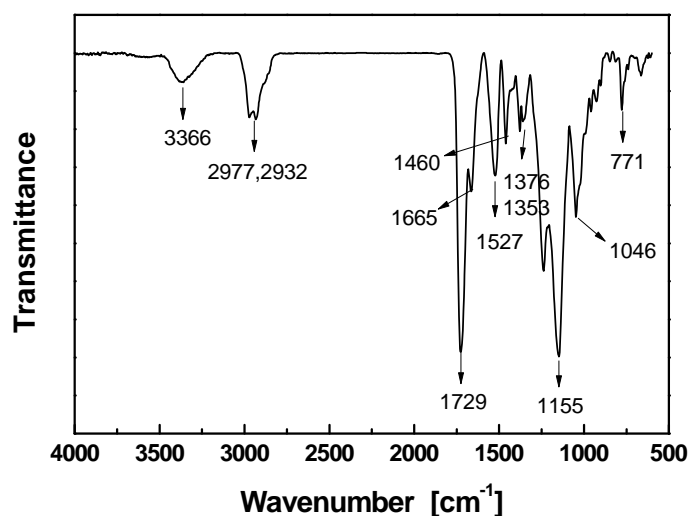

**Fig. S8** FTIR spectrum of Dima/TMPMP.

FTIR spectrum (KBr) of Dima/TMPMP with the following characteristic peaks: 3366  $\text{cm}^{-1}$  (-NH stretching), 2977-2932  $\text{cm}^{-1}$  (-CH<sub>3</sub> and CH<sub>2</sub> stretching), 1729  $\text{cm}^{-1}$  (-C=O of ester and carbamate groups), 1665  $\text{cm}^{-1}$  (C=O of amido group), 1527  $\text{cm}^{-1}$  (C-N-H bending stretching), 1460  $\text{cm}^{-1}$  (-CH<sub>2</sub> bending), 1376  $\text{cm}^{-1}$  (-CH<sub>3</sub>)<sub>2</sub> anti-symmetric bending), 1353  $\text{cm}^{-1}$  (-CH<sub>3</sub> anti-symmetric bending), 1155  $\text{cm}^{-1}$  (C-O-C stretching), 1046  $\text{cm}^{-1}$  (C-O stretching), and 771  $\text{cm}^{-1}$  (N-H out-of-plane bending).

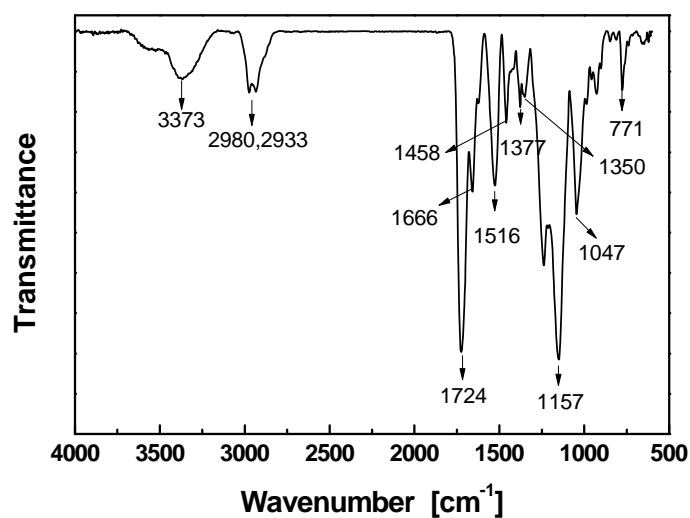

**Fig. S9** FTIR spectrum of Dima/PETMP.

FTIR spectrum (KBr) of Dima/PETMP with the following characteristic peaks: 3373 cm<sup>-1</sup> (-NH stretching), 2980-2933 cm<sup>-1</sup> (-CH<sub>3</sub> and CH<sub>2</sub> stretching), 1724 cm<sup>-1</sup> (-C=O of ester and carbamate groups), 1666 cm<sup>-1</sup> (C=O of amido group), 1516 cm<sup>-1</sup> (C-N-H bending stretching), 1458 cm<sup>-1</sup> (-CH<sub>2</sub> bending), 1377 cm<sup>-1</sup> (-CH<sub>3</sub>)<sub>2</sub> anti-symmetric bending), 1350 cm<sup>-1</sup> (-CH<sub>3</sub> anti-symmetric bending), 1157 cm<sup>-1</sup> (C-O-C stretching), 1047 cm<sup>-1</sup> (C-O stretching), and 771 cm<sup>-1</sup> (N-H out-of-plane bending).

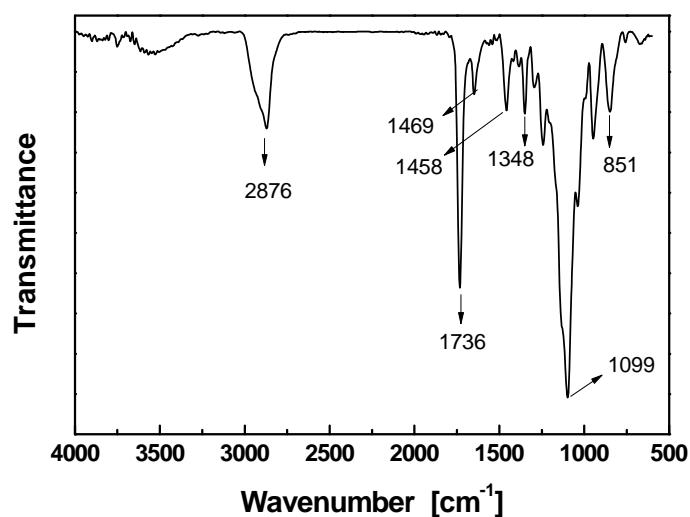

**Fig. S10** FTIR spectrum of PEGDMA/TMPMP.

FTIR spectrum (KBr) of PEGDMMA/TMPMP with the following characteristic peaks: 2876  $\text{cm}^{-1}$  ( $-\text{CH}_3$  and  $\text{CH}_2$  stretching), 1736  $\text{cm}^{-1}$  ( $-\text{C}=\text{O}$  stretching), 1469  $\text{cm}^{-1}$  ( $-\text{CH}_2$  connect to ether linkage, symmetric bending), 1458  $\text{cm}^{-1}$  ( $-\text{CH}_2$ , symmetric bending), 1348  $\text{cm}^{-1}$  ( $-\text{CH}_3$ , symmetric bending), 1250  $\text{cm}^{-1}$  (C-O-C of ester group, symmetric stretching), 1099  $\text{cm}^{-1}$  (C-O-C stretching), and 851  $\text{cm}^{-1}$  ( $-(\text{CH}_2)_2$ , rocking vibration).

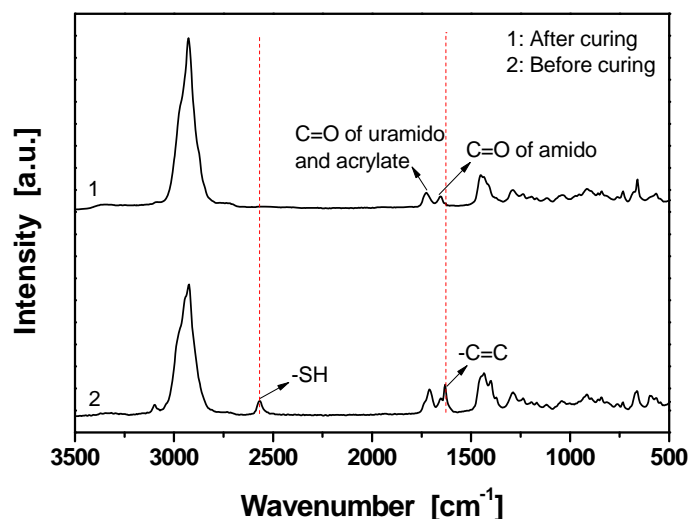

**Fig. S11** FT-Raman spectra of Dima/PETMP before and after curing. Before curing, catalyst DBU was absent in the mixture of Dima/PETMP so that no crosslinking reaction took place.

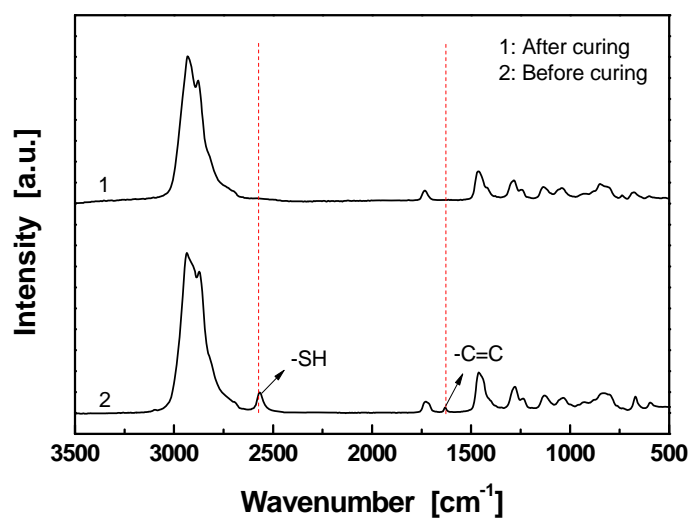

**Fig. S12** FT-Raman spectra of PEGDMMA/TMPMP before and after curing. Before curing,

catalyst DBU was absent in the mixture of PEGDMA/TMPMP so that no crosslinking reaction took place.

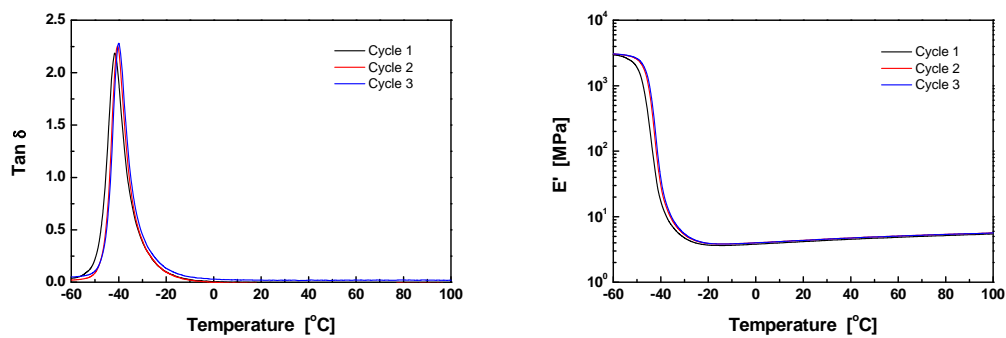

**Fig. S13** Temperature dependences of (a)  $\tan \delta$  and (b) storage modulus of PEGDMA/TMPMP measure by repeated DMA scans.

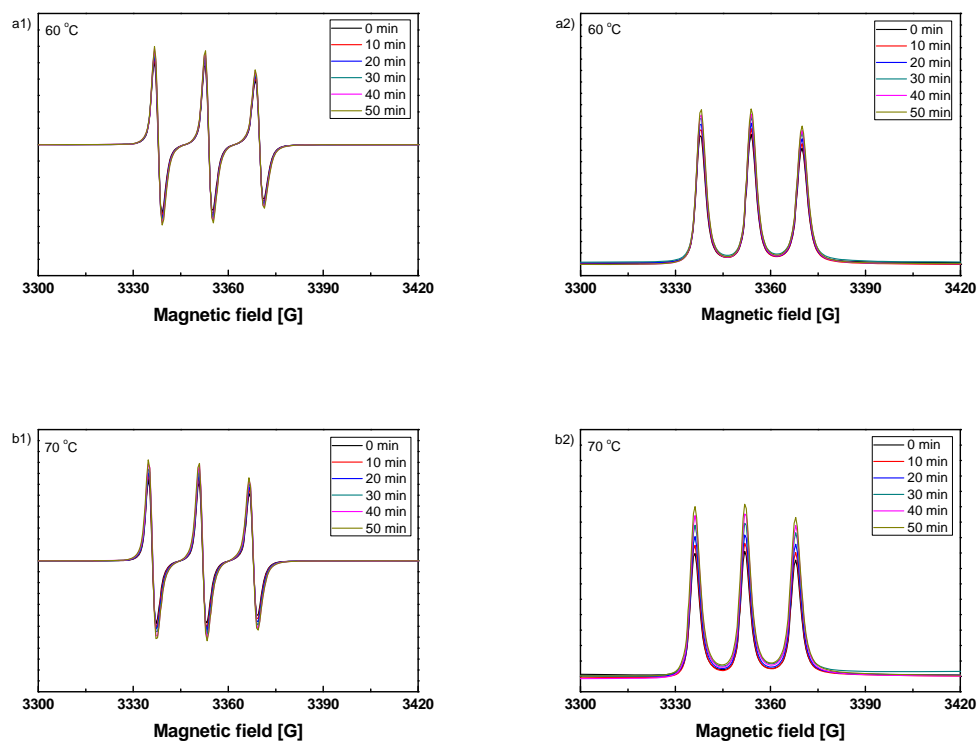



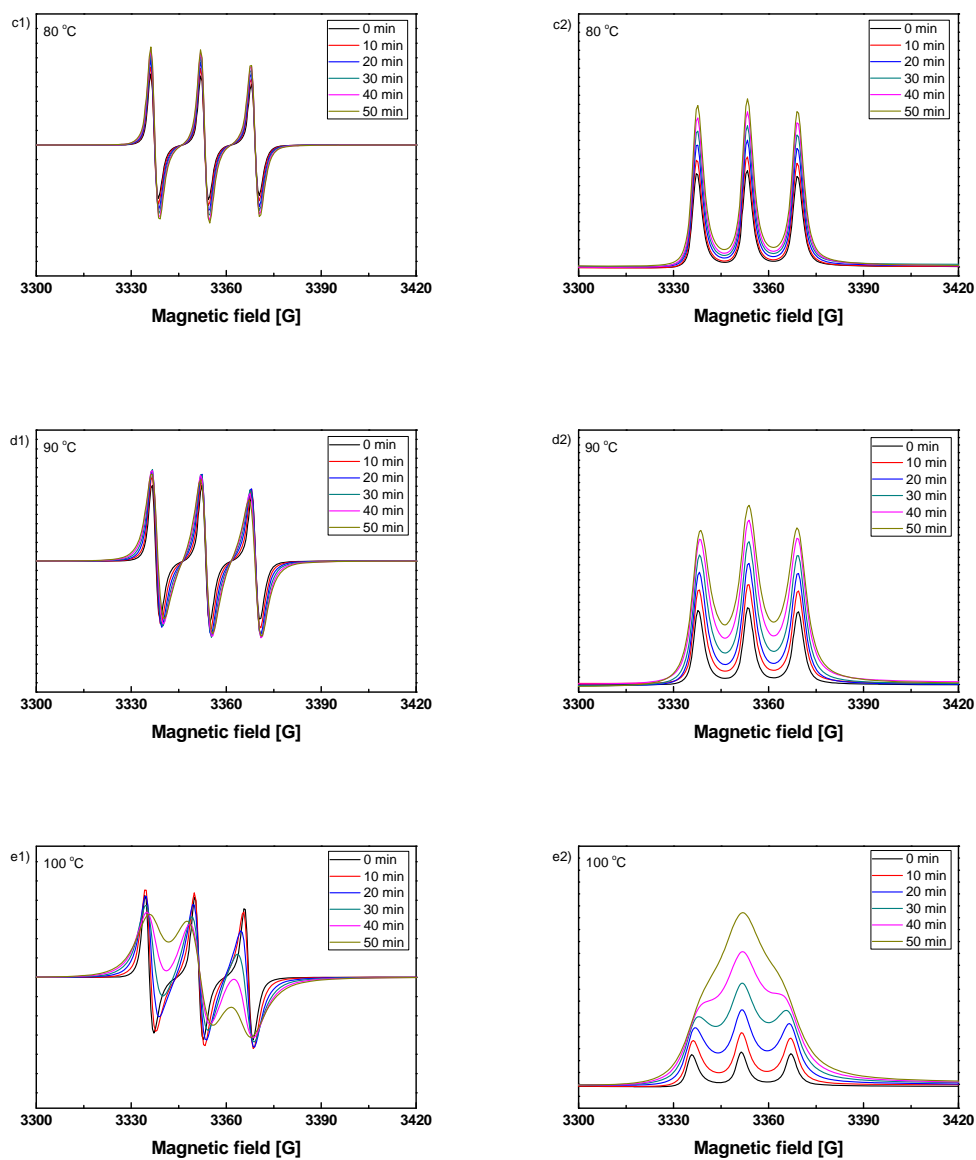

**Fig. S14** (a1)-(e1) Effect of heating time on ESR spectra of Diol measured at different temperatures. (a2)-(e2) Normalized absorption lines obtained from the data of (a1)-(e1).
